# Supplementary material
Source: HighWire-hosted journal article supplement (https://jitc.bmj.com/content/10/3/e003950)

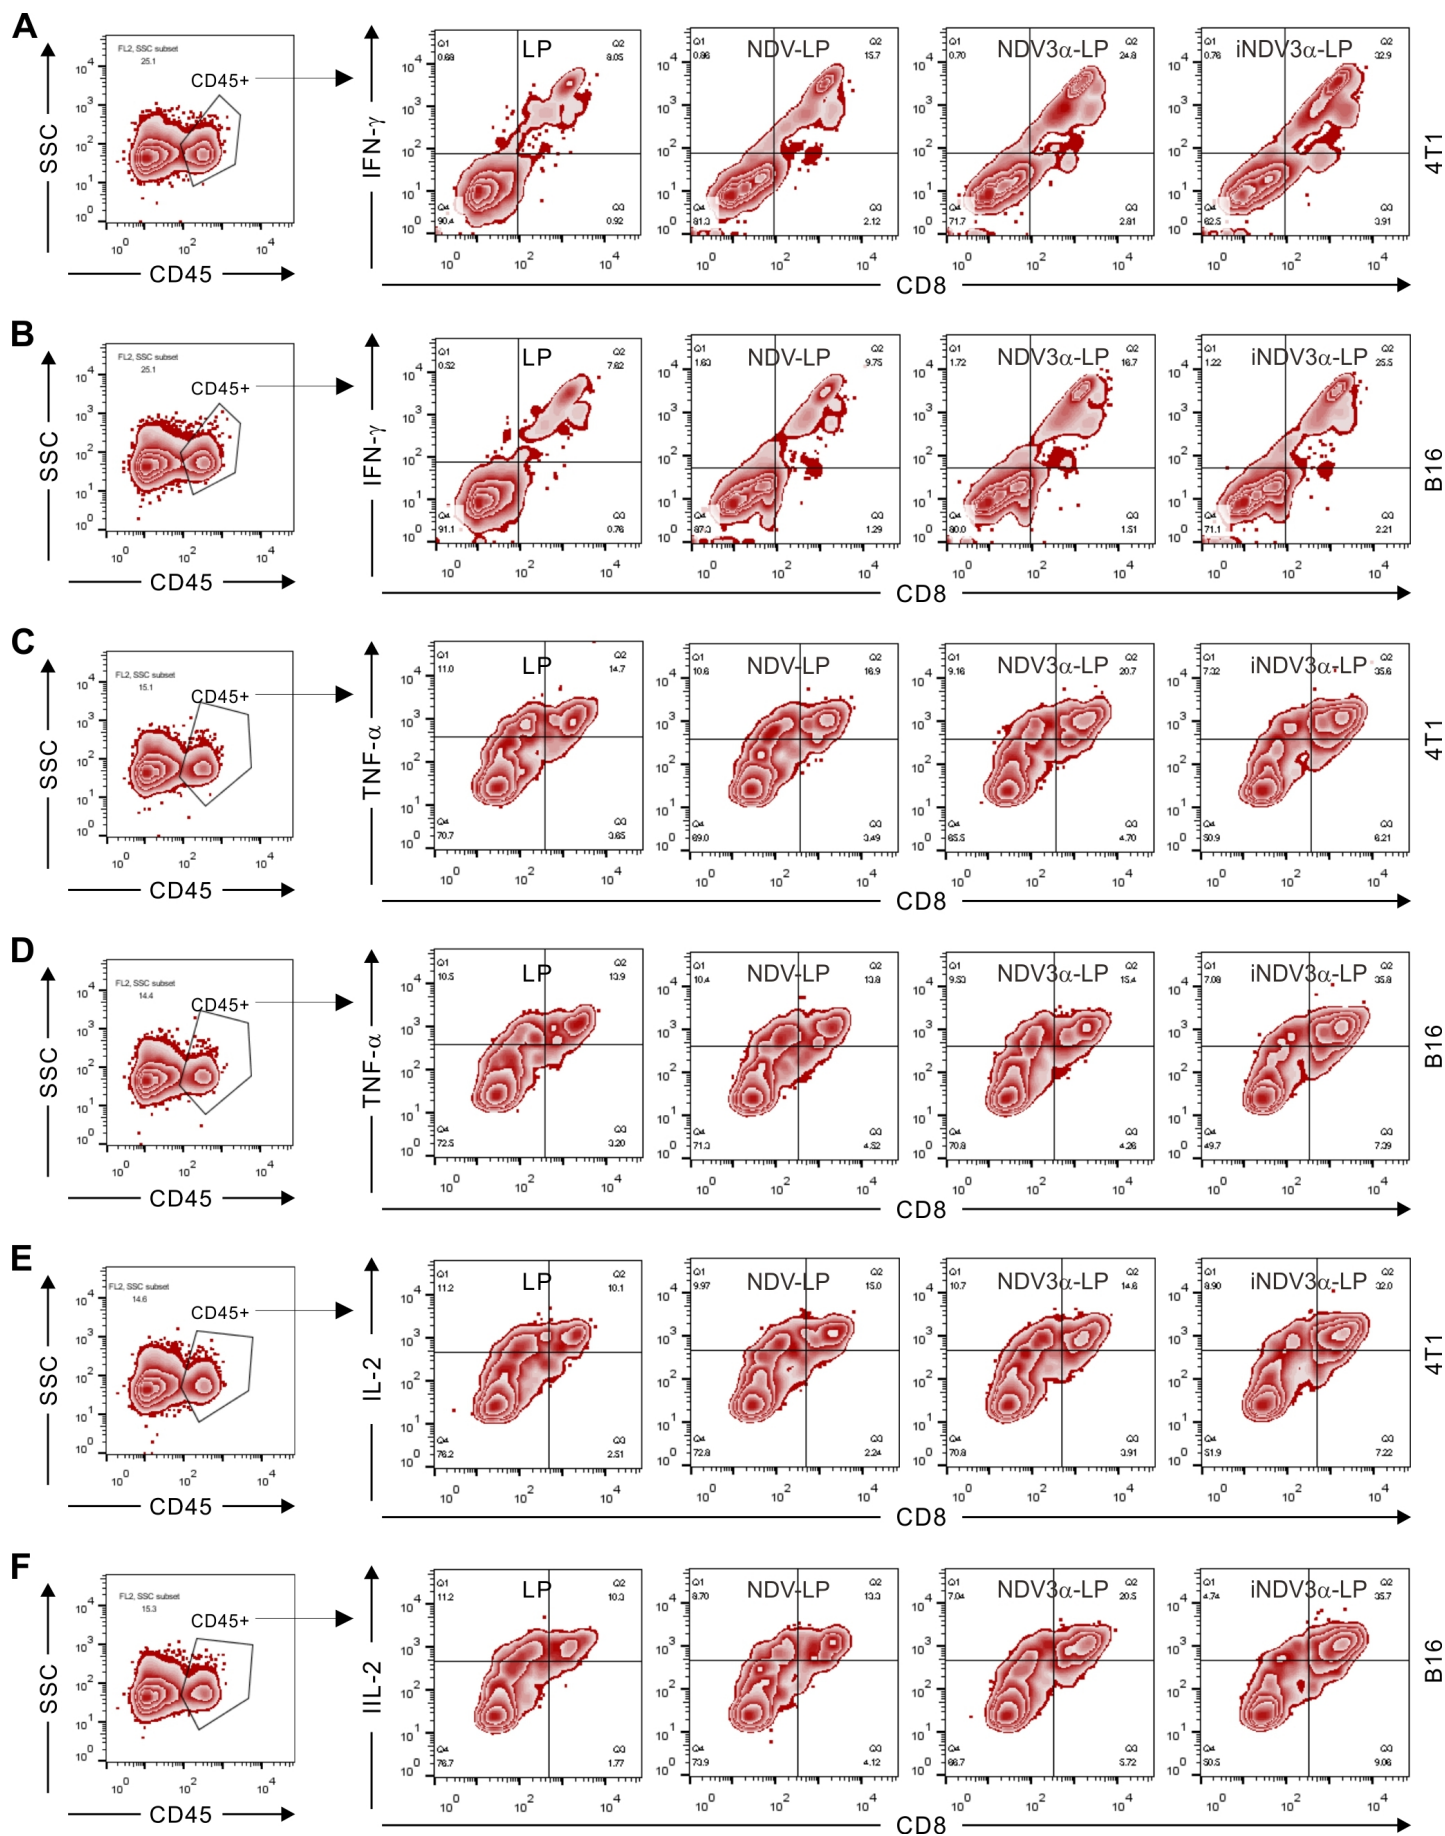

Supplement: inline-supplementary-material-2 [file inline-supplementary-material-2.pdf]

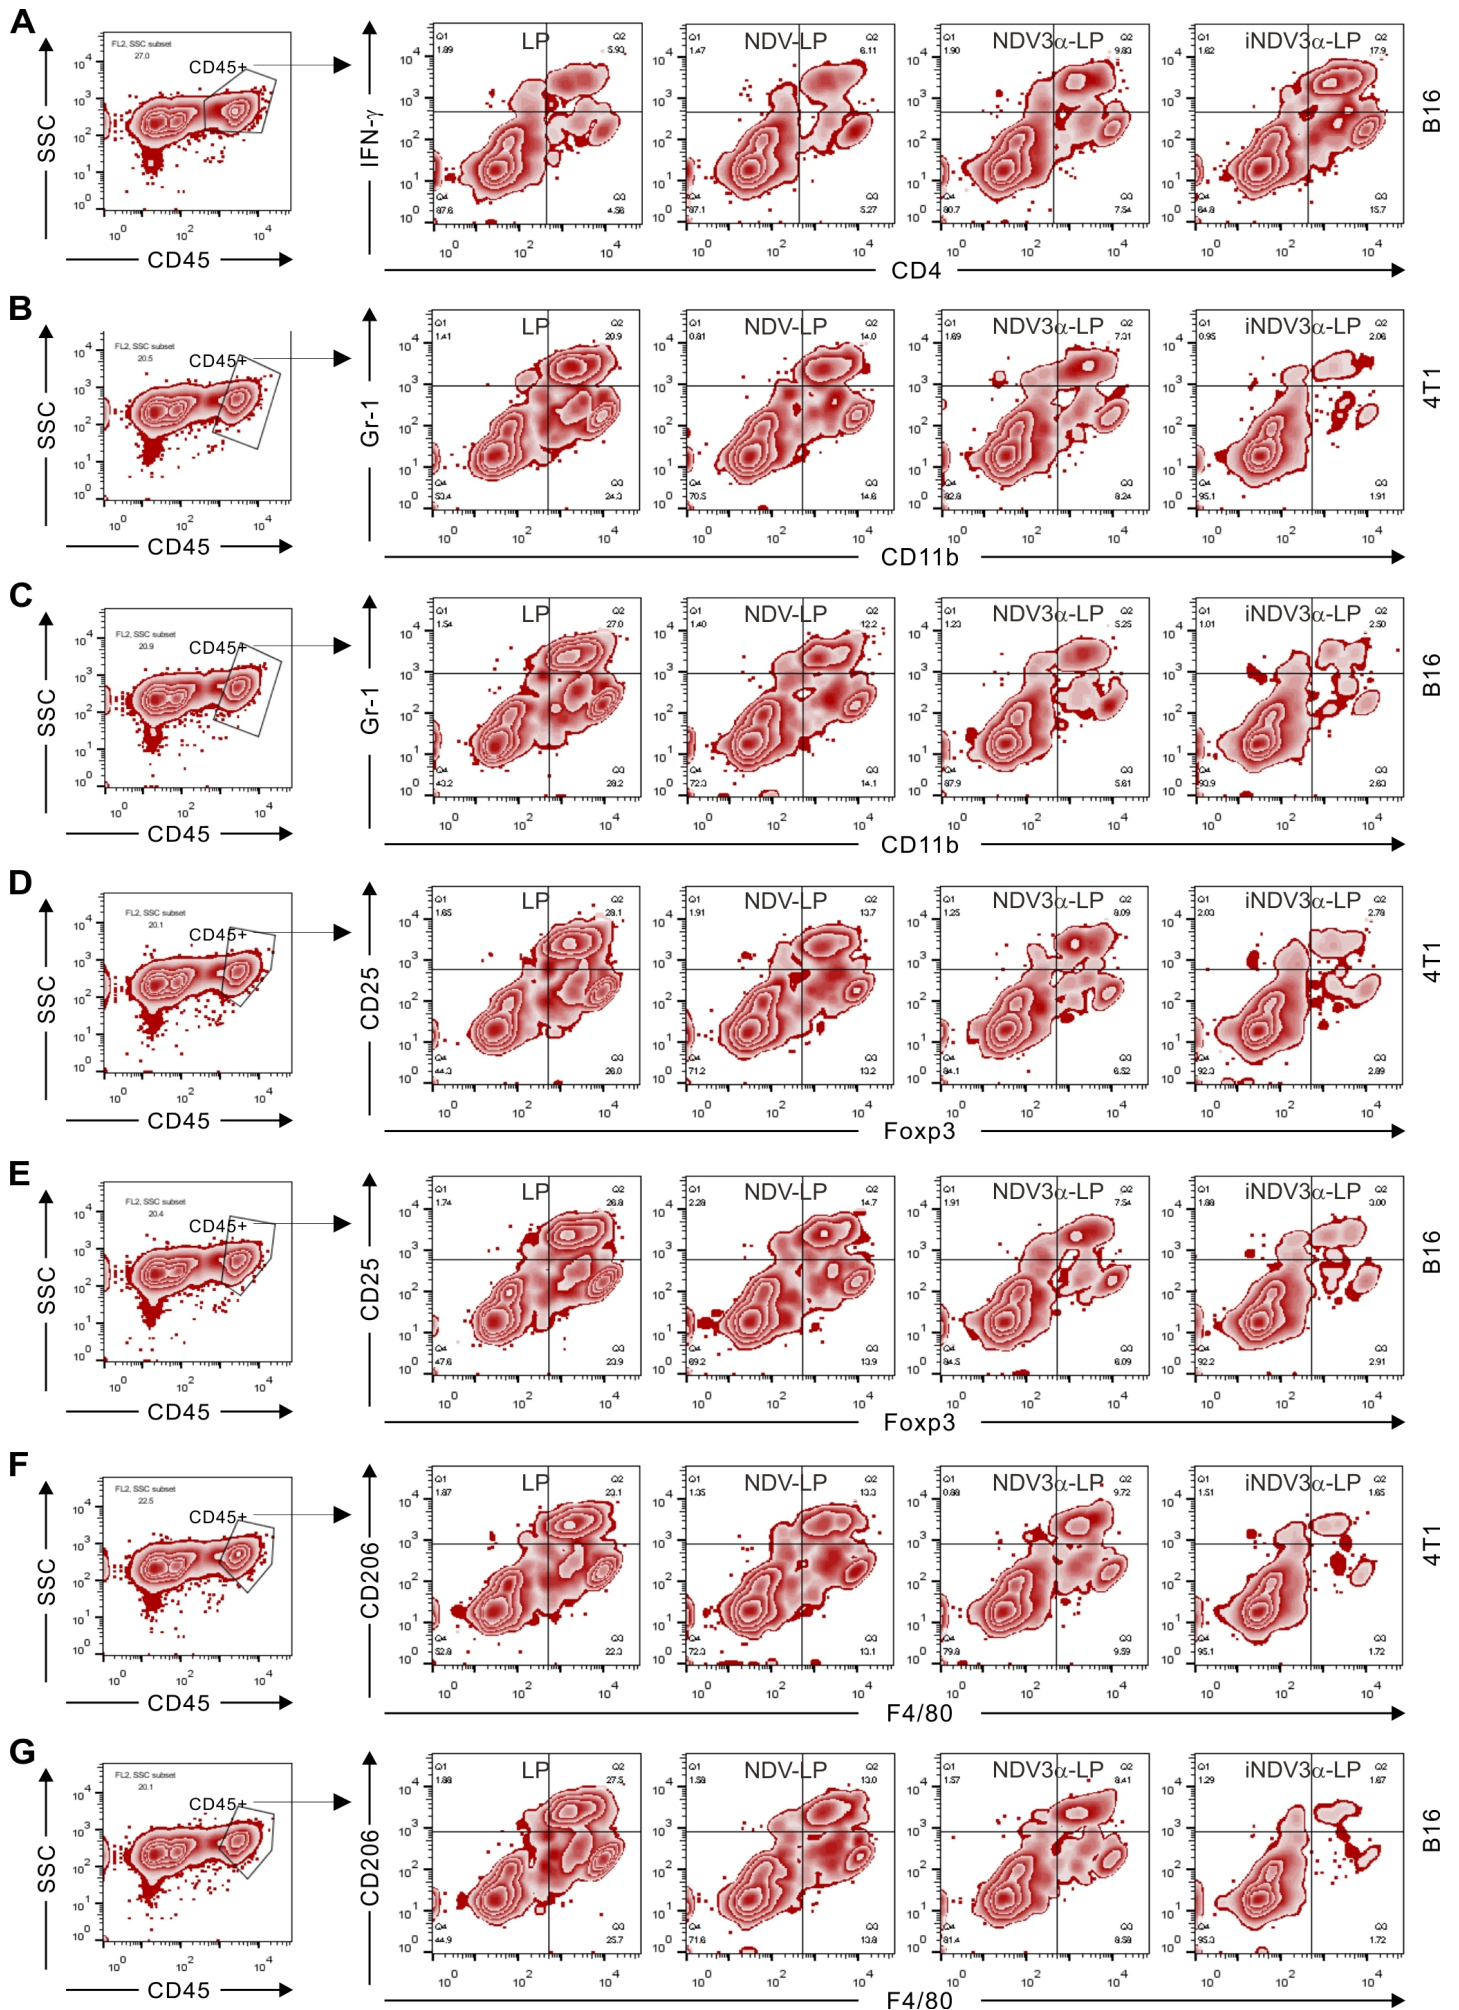

Supplement: inline-supplementary-material-3 [file inline-supplementary-material-3.pdf]
